# Supplementary material
Source: MDPI journal article supplement (https://www.mdpi.com/2311-7524/10/1/81)
Supplement: s1 [file s1]

**Table S1.** GPS coordinates and characteristics of six sites of Salento, Apulia region in Italy, considered in this study.

| N. | Site                 | GPS coordinates       | Habitat               | Climate /average annual rainfall                                       |
|----|----------------------|-----------------------|-----------------------|------------------------------------------------------------------------|
| 1  | San Cataldo          | 40°24'14"N 18°17'06"E | Low rocky/sandy coast | More dry-cool cool due to the prevailing northerly wind / 500 mm       |
| 2  | Otranto              | 40°08'42"N 18°29'38"E | Low rocky coast       | More dry-cool cool due to the prevailing northerly wind / 600-700 mm   |
| 3  | Tricase              | 39°55'45"N 18°23'40"E | Low rocky coast       | More dry-cool due to the prevailing northerly wind / 700 mm            |
| 4  | Santa Maria di Leuca | 39°47'46"N 18°21'57"E | Low rocky coast       | More dry-cool due to the prevailing northerly wind / 700 mm            |
| 5  | Gallipoli            | 40°03'03"N 17°59'49"E | Low rocky coast       | More wet heat because of due to the prevailing southerly wind /400 mm  |
| 6  | Torre Lapillo        | 40°17'14"N 17°49'14"E | Low rocky/sandy coast | More wet heat because of due to the prevailing southerly wind / 400 mm |

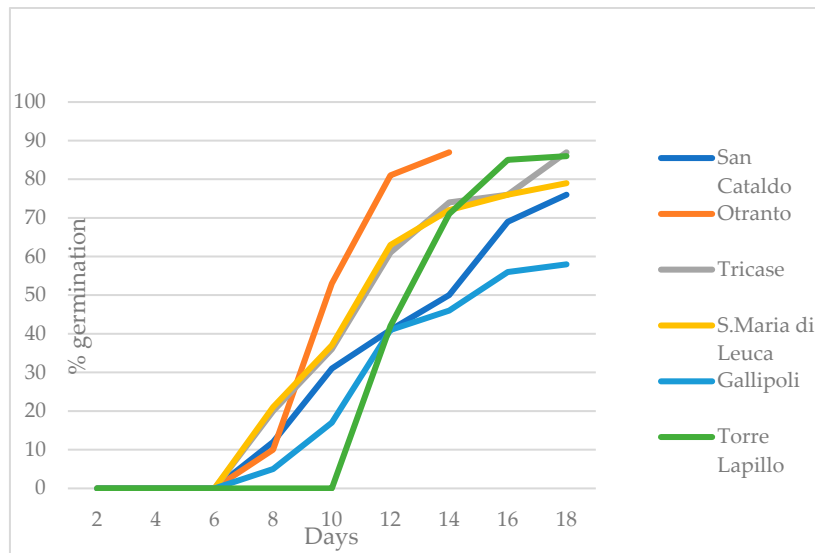

**Figure S1.** Time course of seed cumulative germination (%) rates of *C. maritimum*. The results are presented for plants from different sites. Each line represents a replicate of 100 non dormant seeds.
